# Supplementary material for: Identification of Novel Pathways Regulated by APE1/Ref-1 in Human Retinal Endothelial Cells
Source: MDPI journal article supplement (doi:10.3390/ijms24021101), 2023-01-06
Supplement: s1 [file s1]

# Identification of novel pathways regulated by APE1/Ref-1 in human retinal endothelial cells

**Mahmut Mijit<sup>1#</sup>, Sheng Liu<sup>5#</sup>, Kamakshi Sishtla<sup>2</sup>, Gabriella D. Hartman<sup>2,7</sup>, Jun Wan<sup>5,6@</sup>, Timothy W. Corson<sup>2,3,4,6,7@</sup>, Mark R. Kelley<sup>1,2,3,4,6,7@</sup>**

<sup>1</sup>Herman B Wells Center for Pediatric Research, Department of Pediatrics, Indiana University School of Medicine, Indianapolis, IN, 46202, USA

<sup>2</sup>Department of Ophthalmology, Eugene and Marilyn Glick Eye Institute, Indiana University School of Medicine, Indianapolis, IN, 46202, USA

<sup>3</sup>Department of Pharmacology and Toxicology, Indiana University School of Medicine, Indianapolis, IN, 46202, USA

<sup>4</sup>Department of Biochemistry and Molecular Biology, Indiana University School of Medicine, Indianapolis, IN, 46202, USA

<sup>5</sup>Department of Medical and Molecular Genetics, Indiana University School of Medicine, Indianapolis, IN, 46202, USA

<sup>6</sup>Indiana University Simon Comprehensive Cancer Center, Indiana University School of Medicine, Indianapolis, IN, 46202, USA

<sup>7</sup>Stark Neurosciences Research Institute, Indiana University School of Medicine, Indianapolis, IN, 46202, USA

\*Correspondence should be addressed to Mark R. Kelley; mkelley@iu.edu.

#Equal contributors

@ co-senior authors

## Supplementary Material

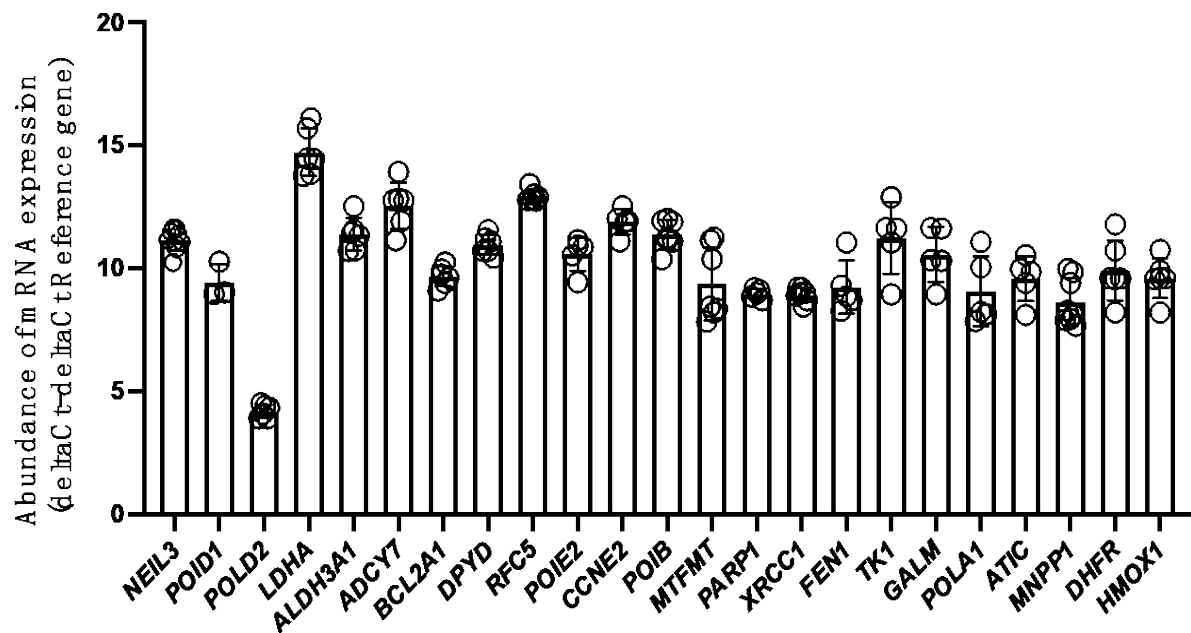

**Figure S1. Relative abundance of expression levels of genes in HREC cells upon basal condition.** Relative mRNA expression levels of key genes from HREC RNA-seq were assessed by qRT-PCR. The data are expressed as cycle threshold ( $C_t$  value difference with respect to reference gene). *BACT* was used as reference gene. Mean  $\pm$  SEM,  $n=3-6$ . At least three independent experiments were performed.

**Table S1. Primer list used for qRT-PCR**

| <b>Gene</b>    | <b>Forward primer</b>   | <b>Reverse primer</b>    |
|----------------|-------------------------|--------------------------|
| <i>NEIL3</i>   | AGTGGTCTCCACCCAGCTGTTA  | AGAGCAAGTCCTGCTTTACGGC   |
| <i>POLD1</i>   | ACTACACGGGAGCCACTGTCAT  | GCGTGGTGTAACACAGGTTGTG   |
| <i>POLD2</i>   | ACTGACCCGTTTCATCTTCCCAG | CAACAGCACTGTCTGGTCCCTCA  |
| <i>LDHA</i>    | GGATCTCCAACATGGCAGCCTT  | AGACGGCTTTCTCCCTCTTGCT   |
| <i>ALDH3A1</i> | CTCGTCATTGGCACCTGGAAC   | CTCGCCATGTTCTCACTCAGCT   |
| <i>ADCY7</i>   | GACGAGATGCTGTCAGCCATTG  | CTCAAAGCCCTTCTCCAGGAAG   |
| <i>BCL2A1</i>  | GGATAAGGCAAAACGGAGGCTG  | CAGTATTGCTTCAGGAGAGATAGC |
| <i>DPYD</i>    | GTGGTGATGTCGTTGGTTTGGC  | GTTCAGGCTTGGCAGAAACGGA   |
| <i>RFC5</i>    | TTCCAGTGGAGACATGCGTAGG  | GTTGGCAATGTCTGACTTGAGCG  |
| <i>POIE2</i>   | TGCGTCCGTTTTCCTAGCAGCA  | GGGCAGACATAAAGAGGTTAGGG  |
| <i>CCNE2</i>   | CTTACGTCCTGATGGTGCTTGC  | CTTGGAGAAAGAGATTTAGCCAGG |
| <i>POLB</i>    | TGCAGAGTCCAGTGGTGACATG  | ATGAACCTTTTGTAAGTCTCCAC  |
| <i>MTFMT</i>   | GCCGACTTTTGAATGAGGCTCTT | CCAGTAACTGTGTCTCCGTGAAG  |
| <i>PARP1</i>   | CCAAGCCAGTTCAGGACCTCAT  | GGATCTGCCTTTTGCTCAGCTTC  |
| <i>XRCC1</i>   | CGGATGAGAACACGGACAGTGA  | GAAGGCTGTGACGTATCGGATG   |
| <i>FEN1</i>    | ACTAAGCGGCTGGTGAAGGTCA  | GCAGCATAGACTTTGCCAGCCT   |
| <i>TK1</i>     | AGCAGCTTCTGCACACATGACC  | CTCGCAGAACTCCACGATGTCA   |
| <i>GALM</i>    | CAACCGAATCGCCAAAGGAACC  | CGAGAACTGGACGCCATTTGAC   |
| <i>POLA1</i>   | GGACCAACACATCTAGCCTGGA  | GGTCTGGTTTCAAAGCCATTGCC  |
| <i>ATIC</i>    | CCGAGAGTAAGGACACCTCCTT  | GGCATCTGAGATACGCCTTTGC   |
| <i>MNPP1</i>   | ACAGTCGATCCAGCTGCACCTT  | CTCTGCATGACCAAAGTGGAGG   |
| <i>DHFR</i>    | CATGGTCTGGATAGTTGGTGGC  | GTGTCACTTTCAAAGTCTTGCATG |
| <i>HMOX1</i>   | CCAGGCAGAGAATGCTGAGTTC  | AAGACTGGGCTCTCCTTGTTGC   |
| <i>BACT</i>    | CACCATTTGGCAATGAGCGGTTC | AGGTCTTTGCGGATGTCCACGT   |
